# Supplementary material for: Design and Fabrication of Hierarchically Porous Carbon with a Template-free Method
Source: PubMed Central journal article supplement — Sci Rep. 2014 Sep 12;4:6349. doi: 10.1038/srep06349 (PMC4162313; doi:10.1038/srep06349), 2014-09-12
Supplement: srep06349-s1.pdf [file srep06349-s1.pdf]

## Supplementary information

# Design and Fabrication of Hierarchically Porous Carbon with a Template-free Method

*Yutong Gong, Zhongzhe Wei, Jing Wang, Pengfei Zhang, Haoran Li and Yong Wang\**

Carbon Nano Materials Group, ZJU-NHU United R&D Center, Center for Chemistry  
of High-Performance and Novel Materials, Key Lab of Applied Chemistry of  
Zhejiang Province, Department of Chemistry, Zhejiang University, 310028 Hangzhou,  
P. R. China.

Fax: (+86)-571-8795-1895. E-mail: [chemwy@zju.edu.cn](mailto:chemwy@zju.edu.cn)

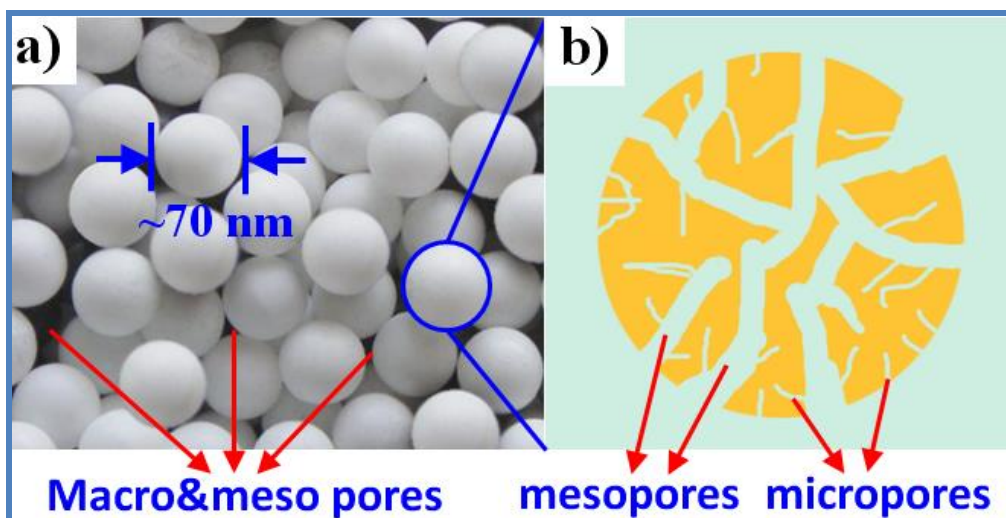

**Figure S1.** The sketch map of the designed hierarchically porous structure

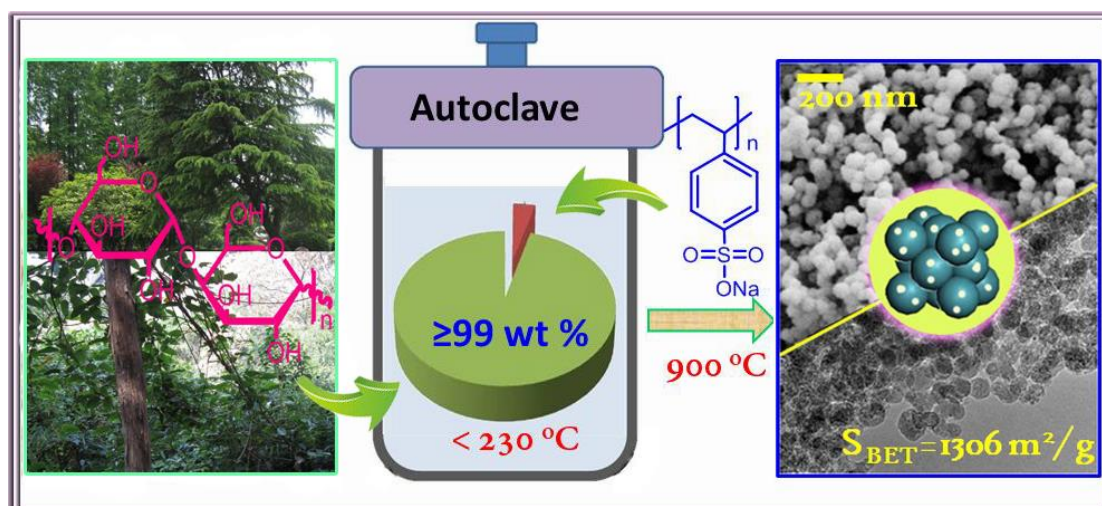

**Figure S2.** The synthetic scheme of the HPCs (The included photographs of plants were taken by the author).

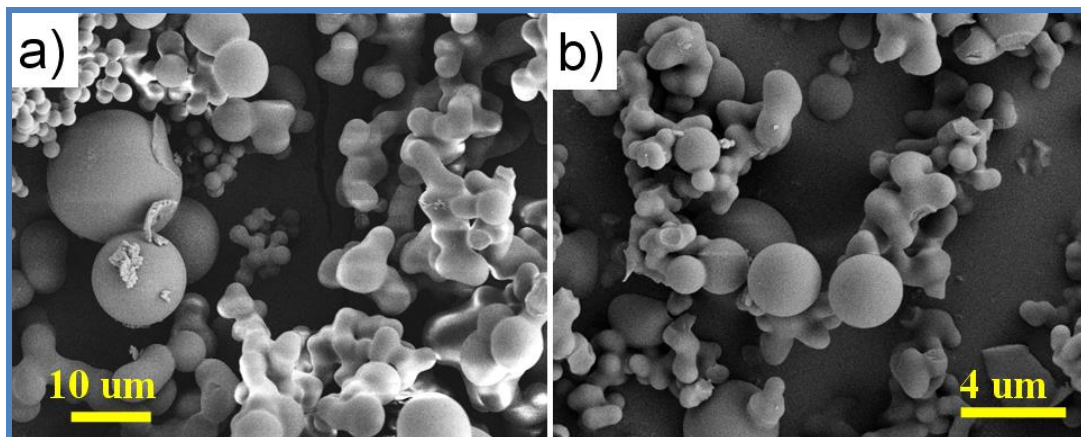

**Figure S3.** SEM images of classical HTC products from fructose (a) and glucose (b).

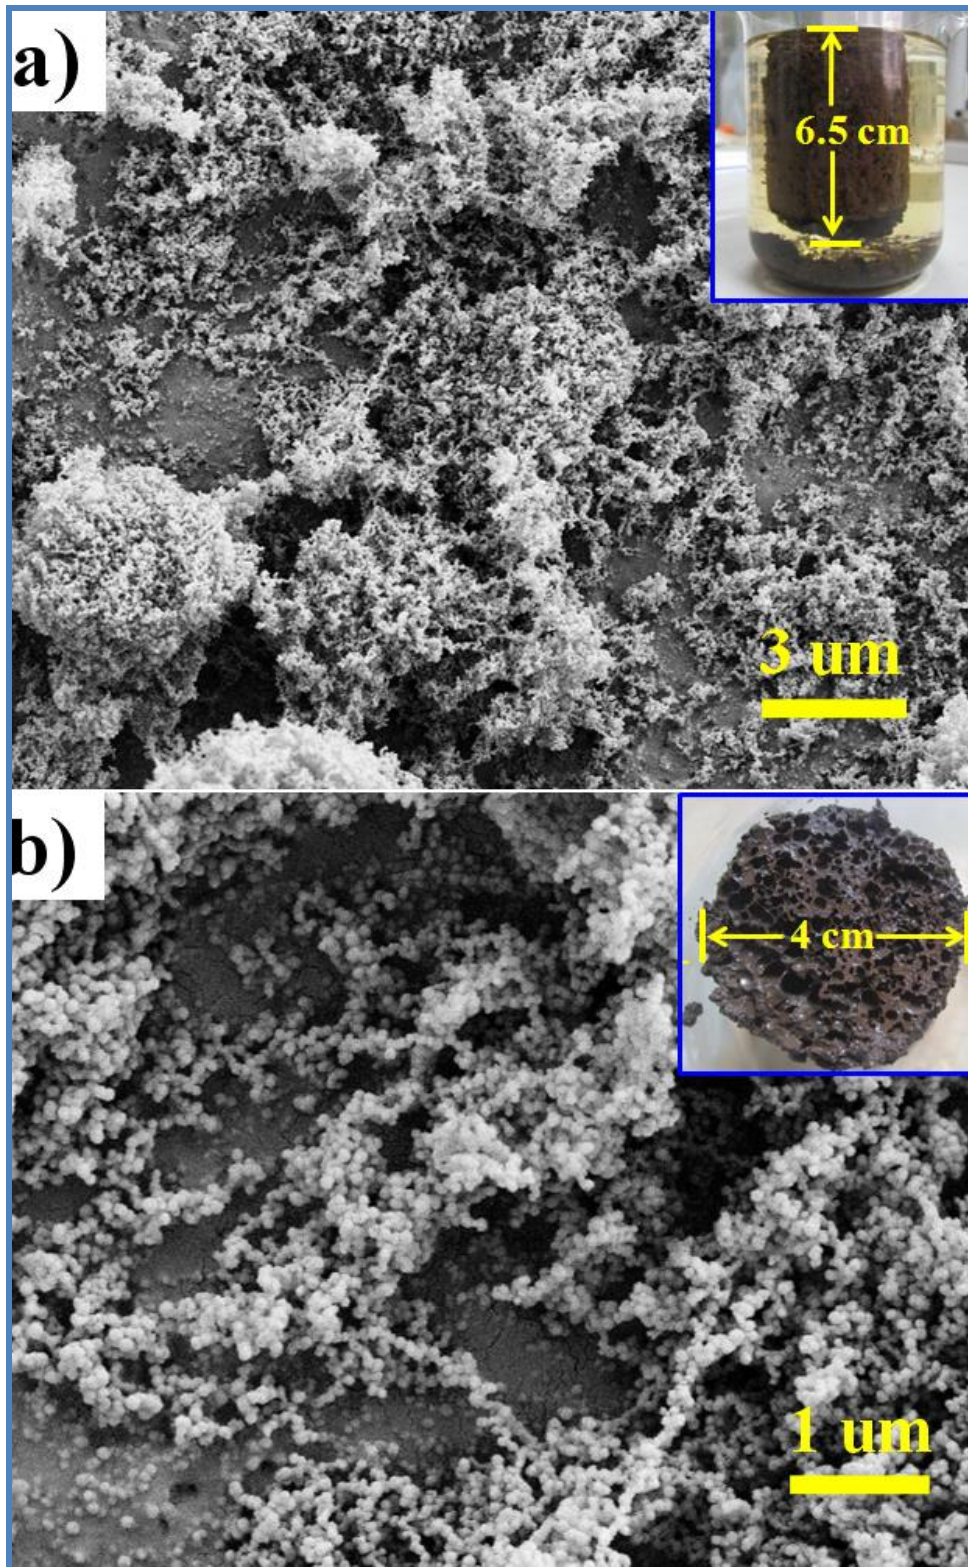

**Figure S4.** SEM images of Fru-40-160 with different magnifications (Insets are the photographs of the KAHTC monolith).



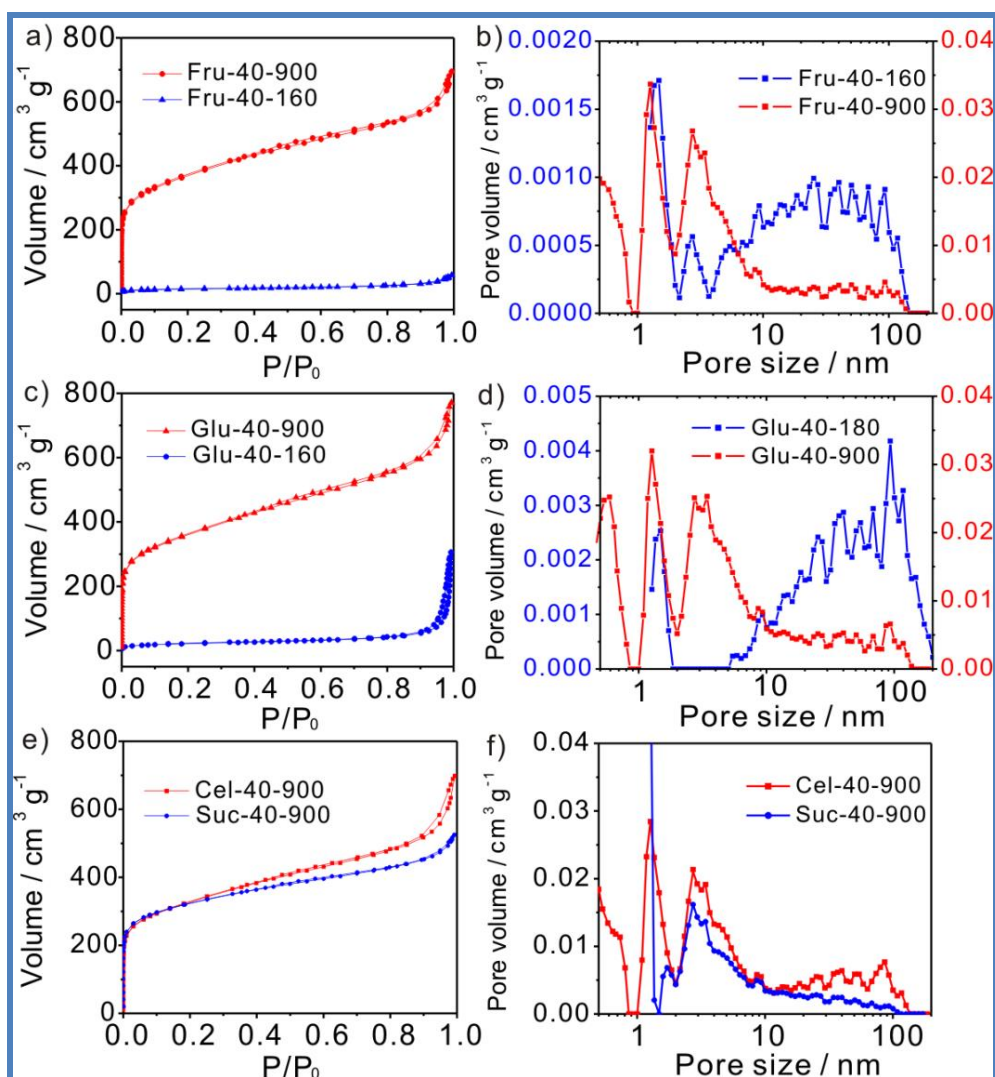

Nitrogen sorption isotherms were performed to quantify the interstitial porous system. The Fru-40-160 and Glu-40-180 show a little mesopores and macropores. After thermal treatment under 900 °C in the air, the surface area was highly enhanced. Abundant mesopores and micropores appeared, in line with the presence of the hysteresis loop.

**Figure S5.** N<sub>2</sub> adsorption-desorption isotherm and corresponding DFT pore size distributions of Fru-40-160, Fru-40-900, Glu-40-180, Glu-40-900, Suc-40-900 and Cel-40-900.

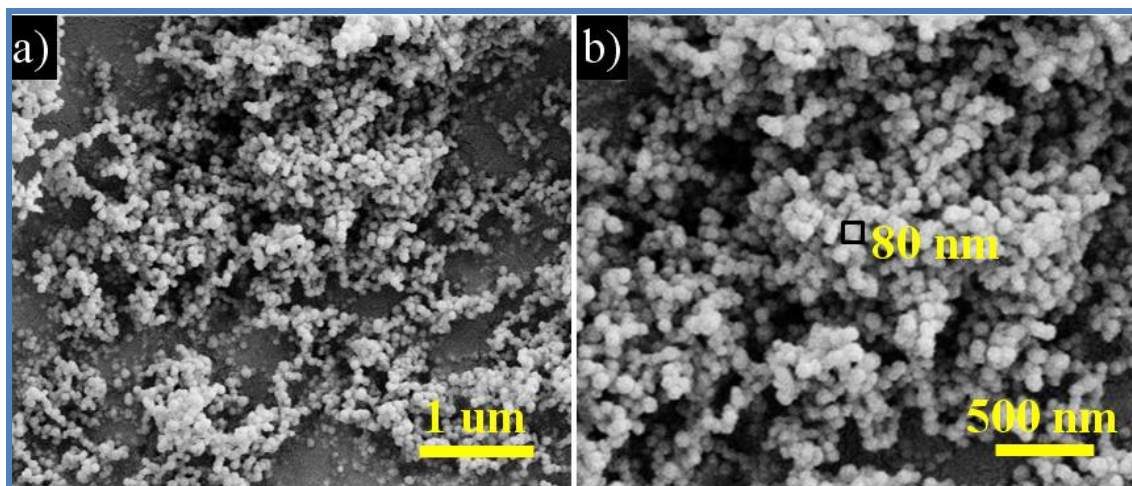

In order to test if KAHTC method is effective at higher sugar concentration, 12 g fructose with 24 mg kayexalate was dissolved in 50 ml water and treated in 160 °C for 8 h under hydrothermal conditions.

**Figure S6.** SEM images of the KAHTC material from fructose at the concentration of 240 g/L (0.2 % kayexalate) with different magnifications.

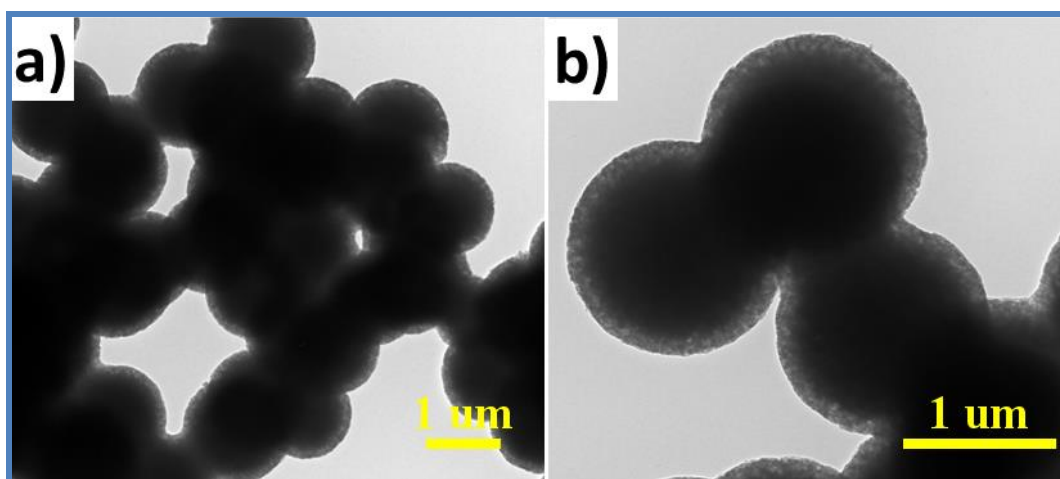

**Figure S7.** TEM images of Fru-900 (selected from the relatively dispersed area)

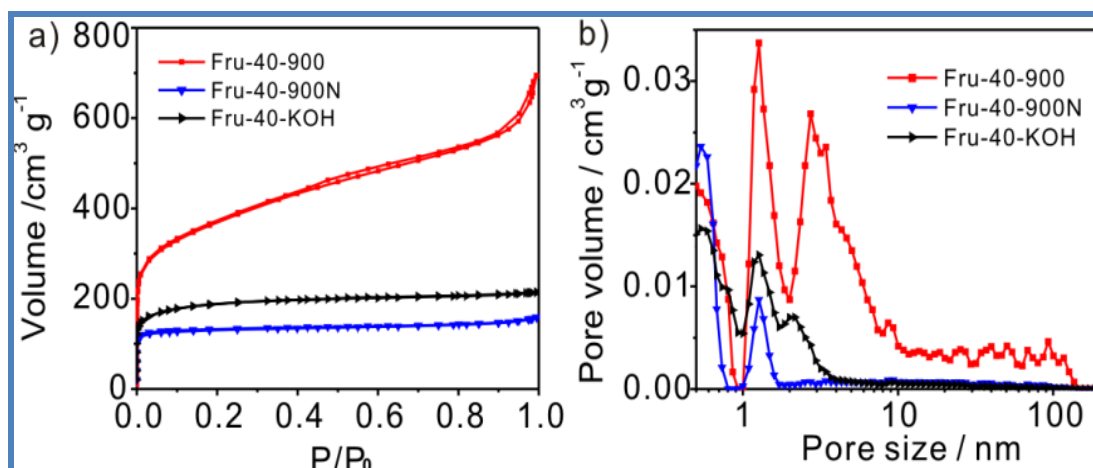

**Figure S8.** N<sub>2</sub> adsorption-desorption isotherms and corresponding DFT pore size distributions of Fru-40-900, Fru-40-900N, Fru-40-KOH.

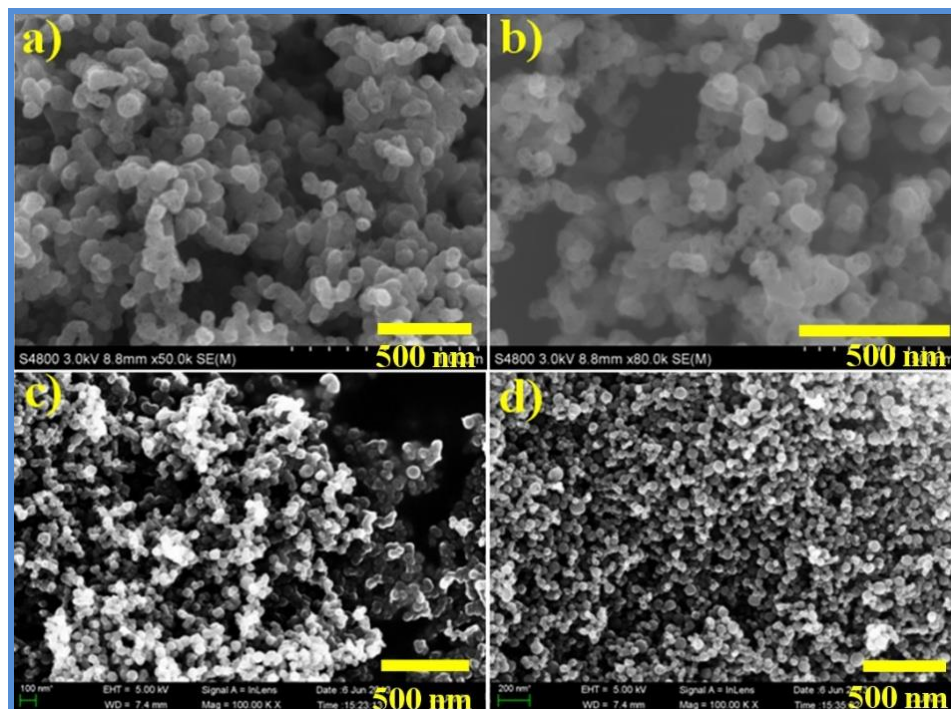

**Figure S9.** SEM images of Fru-8-900 (a) , Fru-16-900 (b), Fru-40-900 (c) and Fru-80-900 (d).

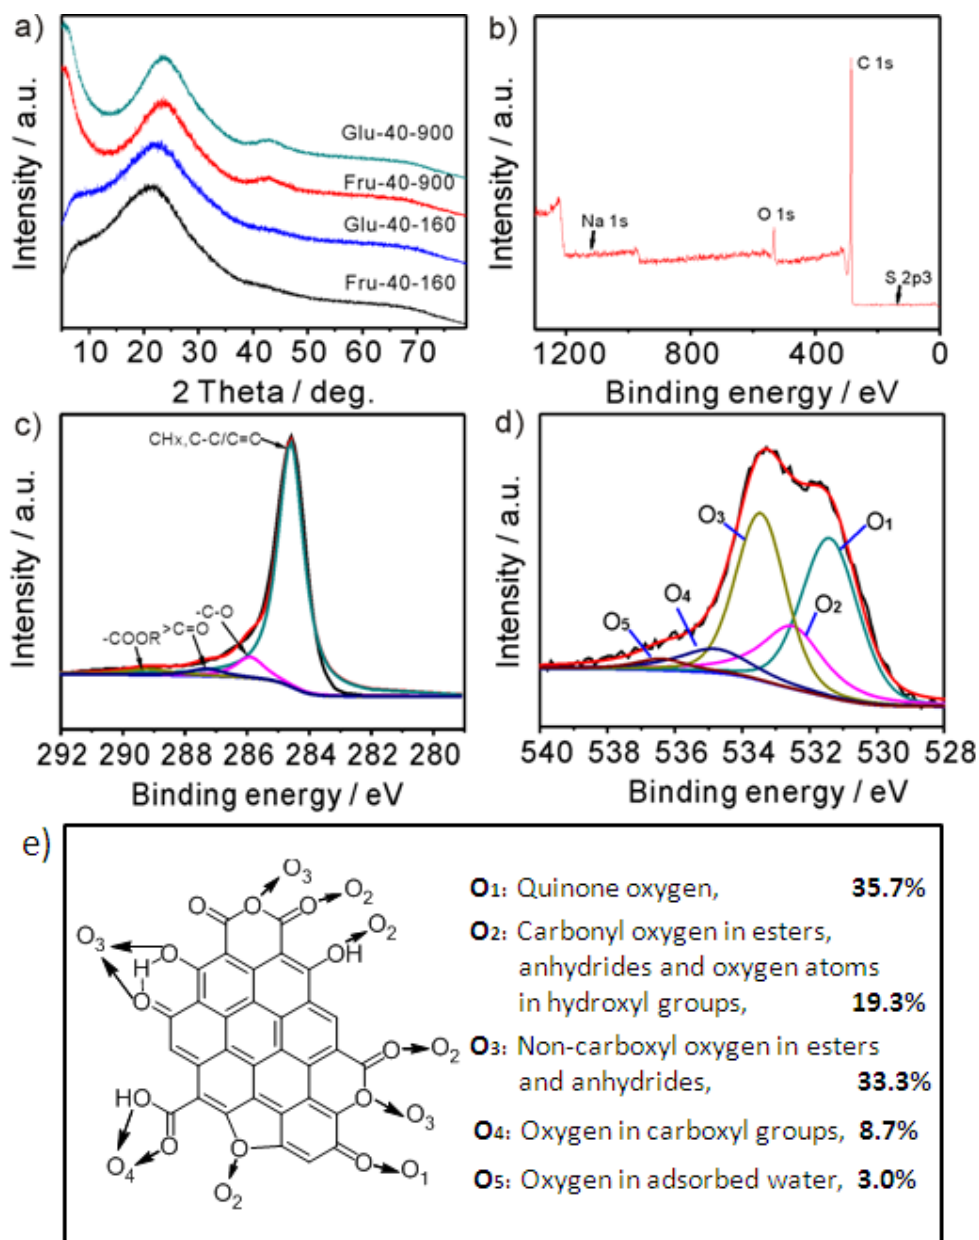

**Figure S10.** XRD analysis of Fru-40-160, Fru-40-900, Glu-40-180, and Glu-40-900

(a). XPS analysis of Fru-40-900 (b), corresponding C (1s) (c) and O (1s) envelopes (d) and structure showing the peak label (e)



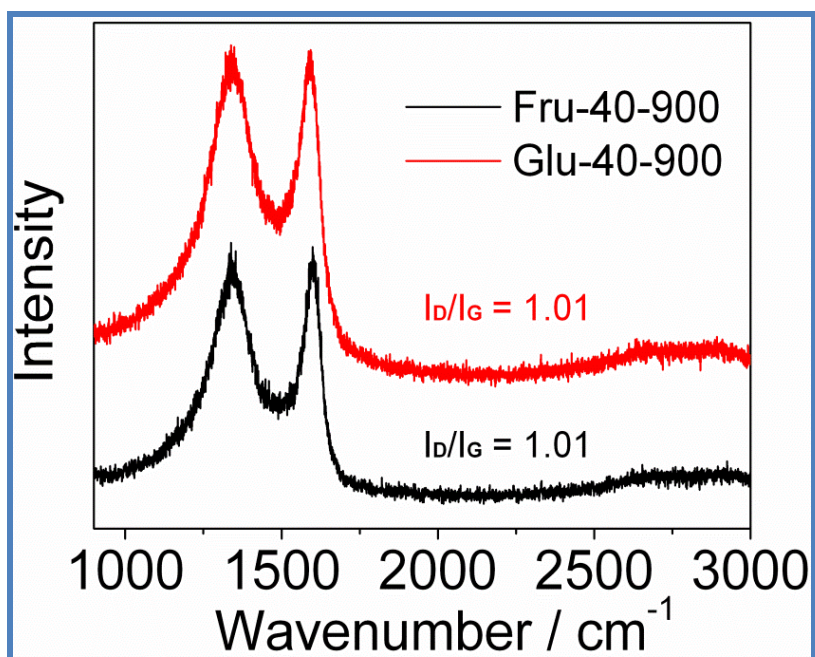

**Figure S11.** Raman spectra of Fru-40-900 and Glu-40-900.

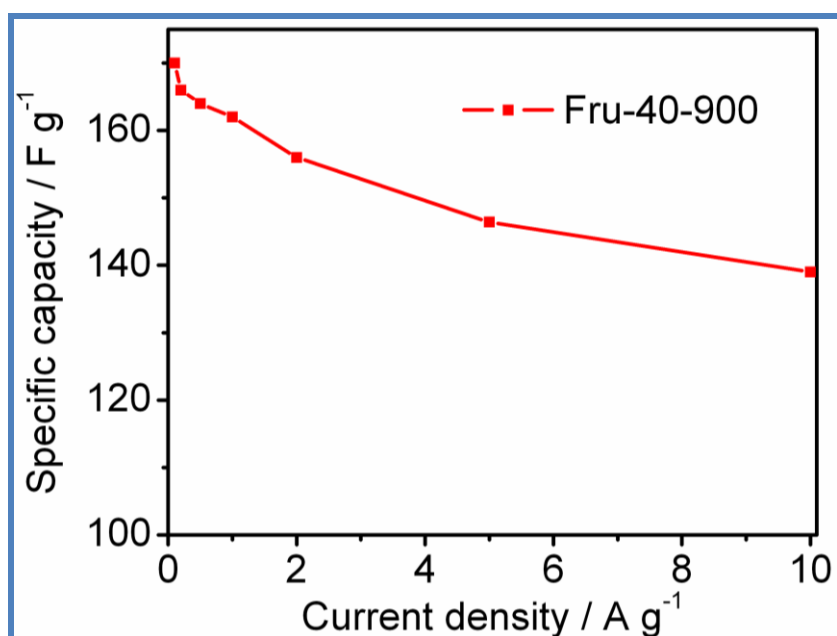

**Figure S12.** Capacitance as a function of current density.

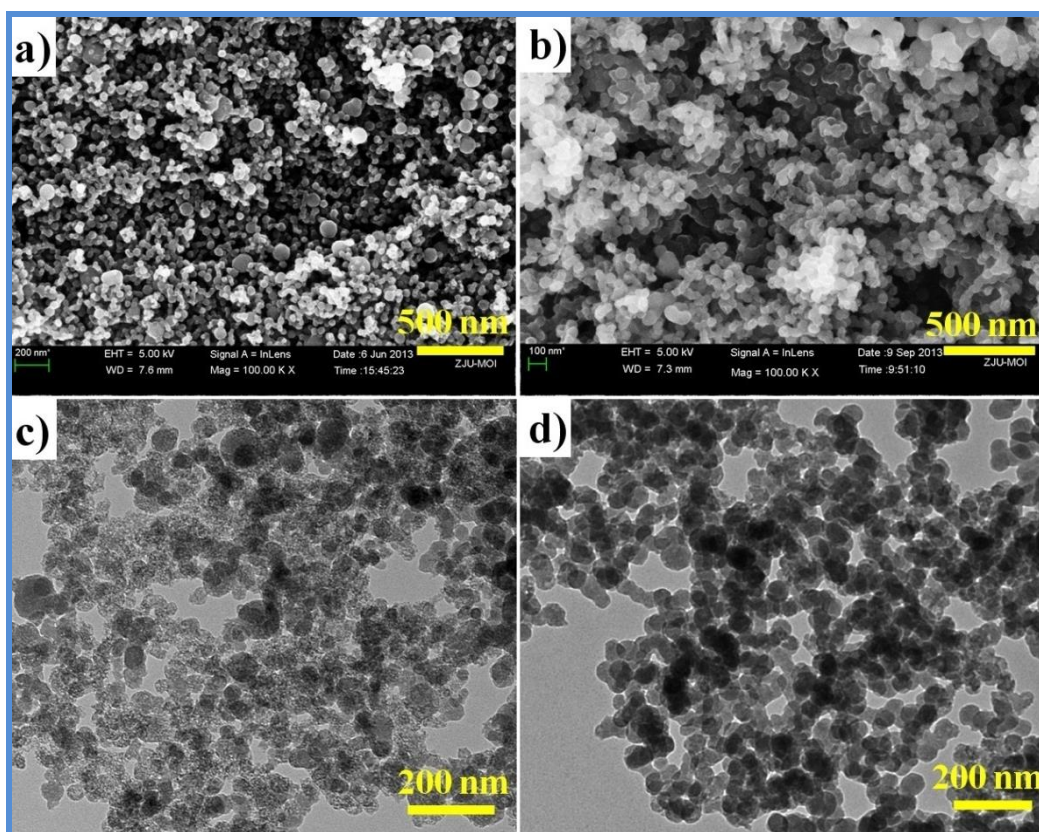

**Figure S13.** SEM images of Cel-40-900 (a) and Suc-40-900 (b). TEM images of Cel-40-900 (c) and Suc-40-900 (d).

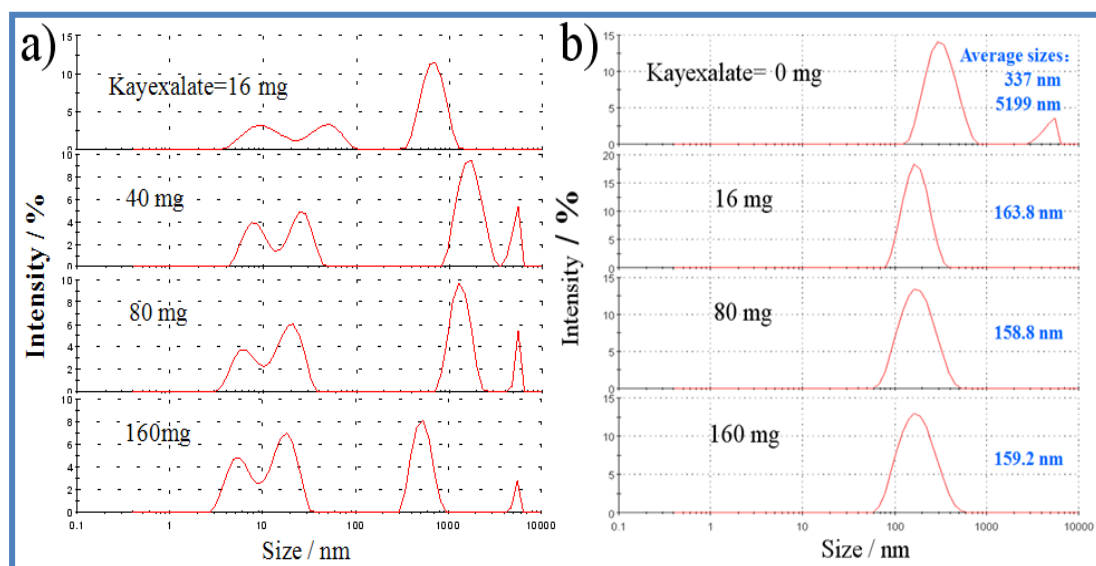

A dynamic light scattering (DLS) test was applied to measure the sizes of kayexalate micelle and the carbon particle sizes.

0, 16, 80 and 160 mg of kayexalate were dissolved in 50 mL water for the kayexalate micelle sizes.

For carbon spheres size measurement, 8 g of fructose, 50 mL of water, 0, 16, 80 or 160 mg of kayexalate were mixed and stirred to a clear solution. And the mixtures were sealed in 100 ml autoclaves. Then they were treated at 160 °C for 2 h. After cooling off, the obtained carbon colloids were centrifuged. The supernatants were taken for zeta potential and particle size measurement.

**Figure S14.** Size distribution of kayexalate micelles (a) and carbon nanoparticles formed during the KAHTC process (b).

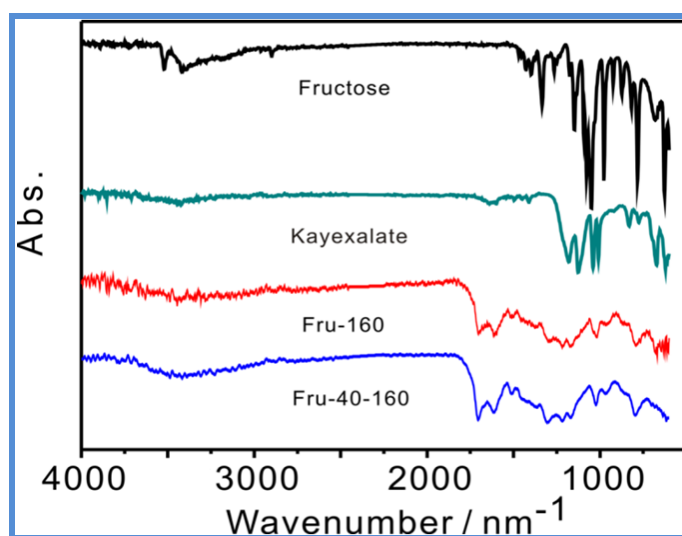

**Figure S15.** FTIR spectra of fructose, kayexalate, Fru-160 and Fru-40-160.

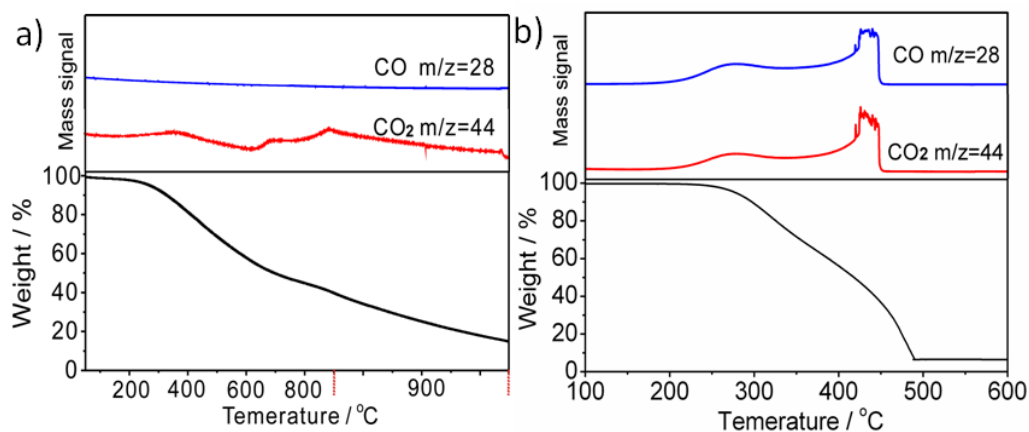

**Figure S16.** TGA-MS analysis of KAHTC material in Ar (a) and air (Ar replaces N<sub>2</sub> to avoid disruption to CO signal) (b)

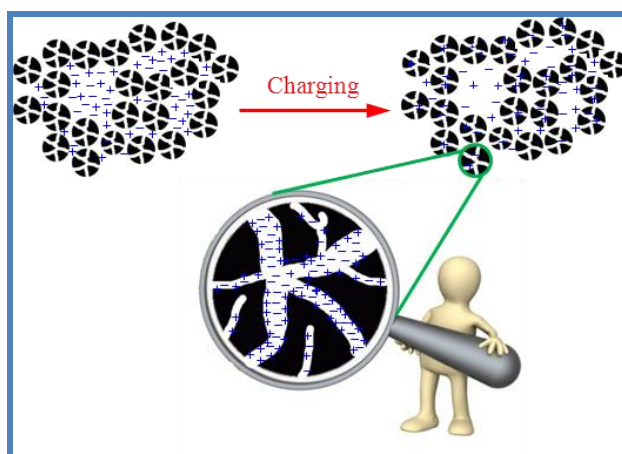

**Scheme S1.** The ion transfer during the charging process

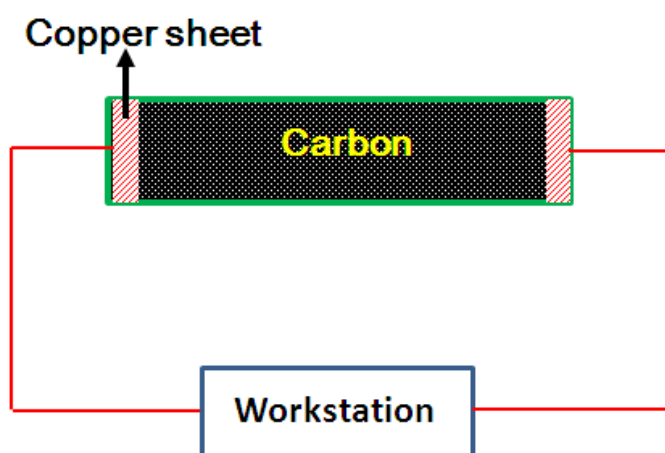

The conductivity of Fru-40-900 was evaluated using an insulating mould filled with carbon materials. For comparison, the conductivities of graphite and conductive acetylene black was also measured and summarized in Table S4.

**Scheme S2.** The devices applied to evaluate electronic conductivity.



**Table S1. Effect of time on hydrothermal yield**

| Entry | Time / h | Yield <sup>[a]</sup> / g | Yield <sup>[b]</sup> / g |
|-------|----------|--------------------------|--------------------------|
| 1     | 0        | 0                        | 0                        |
| 2     | 4        | 1.3                      | 1.4                      |
| 3     | 8        | 2.58                     | 2.35                     |
| 4     | 12       | 2.66                     | 2.48                     |

Reaction conditions: 8 g fructose, 50 mL water, 160 °C

a. 40 mg of kayexalate as additive

b. without additives

**Table S2. Activation yield of different methods <sup>a</sup>**

| Entry          | Methods        | Atmosphere     | Yield / % |
|----------------|----------------|----------------|-----------|
| 1              | This work      | Air            | 23        |
| 2 <sup>b</sup> | This work      | Air            | 28        |
| 3              | KOH, 600 °C    | N <sub>2</sub> | 27        |
| 4              | KOH, 900 °C    | N <sub>2</sub> | 0         |
| 5              | N <sub>2</sub> | N <sub>2</sub> | 55        |

a. Fru-40-160 was applied as the activation precursor

b. 3 g Fru-40-160 was used

**Table S3. Elemental analysis**

| Entry | Samples    | C (w %) | H (w %) | N (w %) | O (w %) <sup>[a]</sup> |
|-------|------------|---------|---------|---------|------------------------|
| 1     | Fru-40-160 | 64.9    | 4.0     | 0       | 31.1                   |
| 2     | Glu-40-180 | 65.2    | 3.9     | 0       | 30.9                   |
| 3     | Fru-40-900 | 81.8    | 1.18    | 0.27    | 16.75                  |
| 4     | Glu-40-900 | 79.9    | 0.97    | 0.26    | 18.87                  |

a. Calculated

**Table S4. Electronic conductivity**

| Entry | Sample          | Conductivity S/m |
|-------|-----------------|------------------|
| 1     | Fru-40-900      | 11.7             |
| 2     | Acetylene black | 141.6            |
